# Supplementary material for: Structure of the ALS Mutation Target Annexin A11 Reveals a Stabilising N-Terminal Segment
Source: MDPI journal article supplement (doi:10.3390/biom10040660), 2020-04-24
Supplement: s1 [file s1]

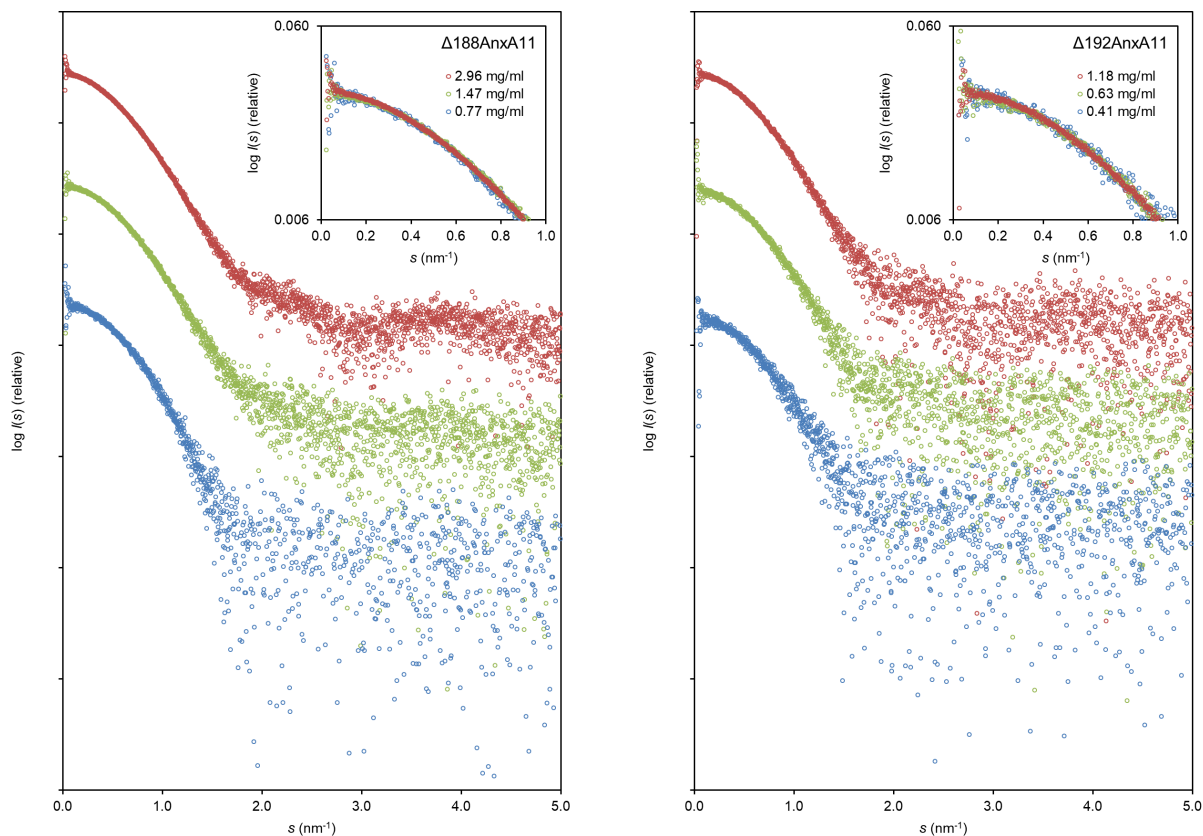

**Figure S1.  $\Delta 188\text{AnxA11}$  and  $\Delta 192\text{AnxA11}$  SAXS dilution data.** Background-subtracted and concentration-normalised scattering data of  $\Delta 188\text{AnxA11}$  (left) and  $\Delta 192\text{AnxA11}$  (right) are shown. The curves have been offset for clarity. The inset in both graphs shows the different concentrations superposed with one another at low angles, as well as the concentration of each dataset.
